# Supplementary material
Source: PubMed Central journal article supplement (PMC1304880)
Supplement: biophysj_104.046839_1.pdf [file biophysj_104.046839_1.pdf]

## Supplementary Material

Oligomerization of amyloid A $\beta_{16-22}$  peptides using hydrogen bonds and hydrophobicity forces.  
G. Favrin, A. Irbäck and S. Mohanty.

**Table I.** The probability distribution  $P(n_+, n_-)$  at different temperatures for the system of three A $\beta_{16-22}$  peptides.

| $(n_+, n_-)$ | 369 K    | 354 K    | 339 K    | 325 K     | 312 K     | 299 K     | 287 K    | 275 K    |
|--------------|----------|----------|----------|-----------|-----------|-----------|----------|----------|
| (0,0)        | 0.994(1) | 0.990(1) | 0.961(3) | 0.849(15) | 0.58(3)   | 0.33(2)   | 0.22(2)  | 0.17(2)  |
| (0,1)        | 0.002(1) | 0.006(1) | 0.021(2) | 0.074(8)  | 0.170(14) | 0.23(2)   | 0.23(2)  | 0.22(3)  |
| (0,2)        |          |          | 0.002(1) | 0.014(3)  | 0.063(10) | 0.12(2)   | 0.14(3)  | 0.14(3)  |
| (1,0)        | 0.001(1) | 0.003(1) | 0.012(1) | 0.039(5)  | 0.085(9)  | 0.117(15) | 0.13(2)  | 0.13(2)  |
| (1,1)        | 0.001(1) |          | 0.002(1) | 0.021(5)  | 0.09(2)   | 0.19(3)   | 0.26(5)  | 0.32(6)  |
| (2,0)        |          |          |          | 0.002(1)  | 0.009(2)  | 0.014(4)  | 0.016(5) | 0.020(7) |

**Table II.** Same as Table I for the six-chain system.

| $(n_+, n_-)$ | 369 K    | 354 K    | 339 K    | 325 K     | 312 K     | 299 K     | 287 K     |
|--------------|----------|----------|----------|-----------|-----------|-----------|-----------|
| (0,0)        | 0.986(1) | 0.923(5) | 0.65(2)  | 0.26(2)   | 0.096(9)  | 0.045(6)  | 0.028(5)  |
| (0,1)        | 0.008(1) | 0.035(2) | 0.109(6) | 0.144(8)  | 0.112(11) | 0.080(11) | 0.059(11) |
| (0,2)        |          | 0.006(1) | 0.043(6) | 0.100(12) | 0.11(2)   | 0.09(2)   | 0.08(2)   |
| (0,3)        |          |          | 0.009(2) | 0.038(8)  | 0.060(14) | 0.07(2)   | 0.06(2)   |
| (0,4)        |          |          | 0.001(1) | 0.006(3)  | 0.016(8)  | 0.025(12) | 0.030(15) |
| (1,0)        | 0.005(1) | 0.023(2) | 0.069(5) | 0.087(7)  | 0.068(7)  | 0.049(6)  | 0.038(6)  |
| (1,1)        |          | 0.008(1) | 0.063(7) | 0.142(14) | 0.16(2)   | 0.14(2)   | 0.12(2)   |
| (1,2)        |          | 0.002(1) | 0.028(5) | 0.106(15) | 0.16(2)   | 0.17(3)   | 0.16(3)   |
| (1,3)        |          |          | 0.002(1) | 0.016(4)  | 0.043(11) | 0.07(2)   | 0.10(3)   |
| (1,4)        |          |          |          |           | 0.001(1)  | 0.003(1)  | 0.006(3)  |
| (2,0)        |          | 0.002(1) | 0.011(3) | 0.025(8)  | 0.029(10) | 0.028(11) | 0.026(11) |
| (2,1)        |          |          | 0.010(3) | 0.04(2)   | 0.07(3)   | 0.10(4)   | 0.11(5)   |
| (2,2)        |          |          | 0.003(1) | 0.021(7)  | 0.06(2)   | 0.10(4)   | 0.14(5)   |
| (2,3)        |          |          |          |           | 0.001(1)  | 0.002(1)  | 0.004(2)  |
| (3,0)        |          |          | 0.001(1) | 0.004(2)  | 0.007(4)  | 0.008(5)  | 0.008(5)  |
| (3,1)        |          |          |          | 0.003(2)  | 0.008(5)  | 0.011(7)  | 0.013(9)  |
| (3,2)        |          |          |          |           | 0.004(3)  | 0.009(7)  | 0.015(12) |
